# Supplementary material for: A high-performance asymmetric supercapacitor device based on CoO@CoAl-LDH hierarchical 3D nanobouquet arrays
Source: Royal Society of Chemistry journal article supplement (doi:10.1039/d2ce01698b), 2023-01-01
Supplement: d2ce01698b1.pdf [file d2ce01698b1.pdf]

## Supporting Information

### **A High Performance Asymmetric Supercapacitor Device Based on CoO@CoAl-LDH Hierarchical 3D Nanobouquet Arrays**

Yuan Song<sup>1,2,3</sup>, Qiang Shen<sup>1,\*</sup>, Guo-Xiang Pan<sup>1,\*</sup>, Chao Ye<sup>2</sup>, Yi-Fan Zhang<sup>1</sup>, Lin Song

<sup>3</sup>

<sup>1</sup> Department of Materials Chemistry, Huzhou University, Huzhou 313000, China

<sup>2</sup> Yangtze River Delta Research Institute, Northwestern Polytechnical University, Taicang 215400, China

<sup>3</sup> School of Materials Science and Engineering, Northwestern Polytechnical University, Xi'an 710072, China

\*Corresponding authors: Department of Materials Chemistry, Huzhou University, Huzhou 313000, China

E-mail addresses: qiangshen@zjhu.edu.cn (Q. Shen), pgxzjut@163.com (GX. Pan)

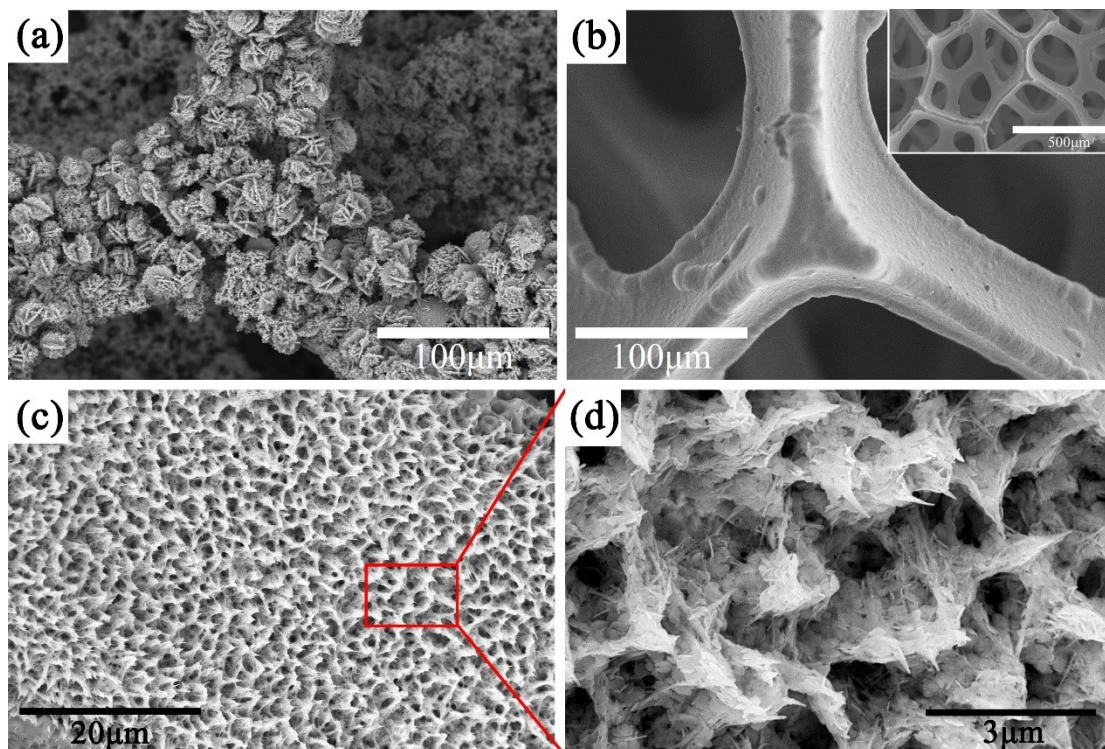

**Fig. S1** SEM image of (a)CoO@CoAl-LDH/NF, (b) pure Nickel Foam with an inset of low magnification, CoAl-LDH nanoneedles with low magnification (c) and high magnification (d).

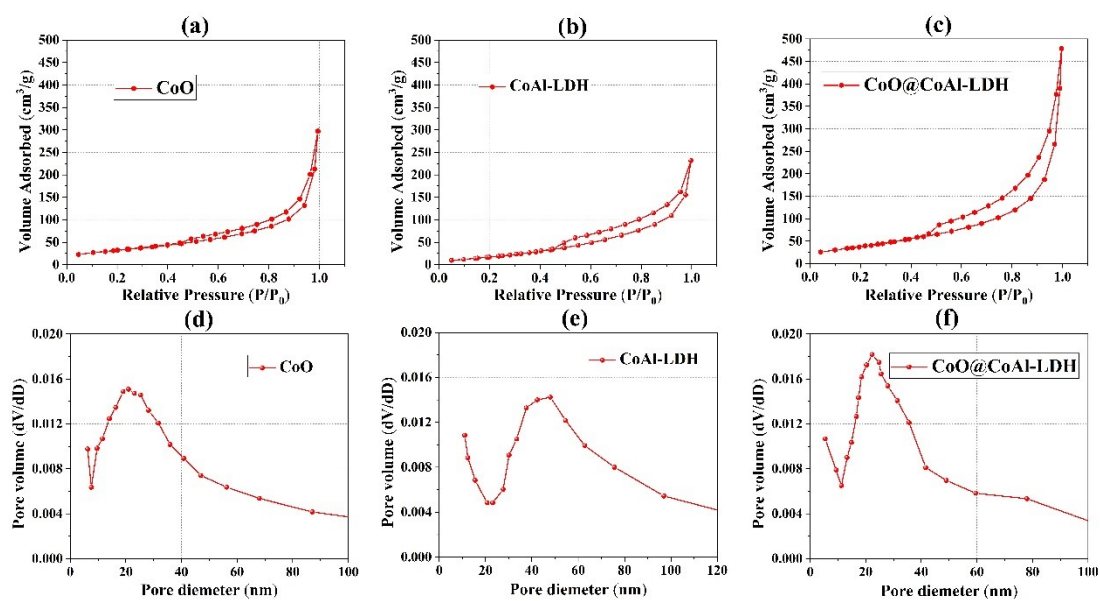

**Fig. S2** Nitrogen adsorption-desorption isotherms of (a) CoO nanosheets, (b) CoAl-LDH nanoneedles, (c)CoO@ CoAl-LDH nanobouquets, pore size distribution curves of (d) CoO nanosheets, (e) CoAl-LDH nanoneedles, (f) CoO@ CoAl-LDH nanobouquets

**Table. S1** Data analysis of nitrogen absorption and desorption

| Materials                  | S <sub>BET</sub> (m <sup>2</sup> g <sup>-1</sup> ) | Average Pore Size (nm) |
|----------------------------|----------------------------------------------------|------------------------|
| CoO nanosheets             | 115.6                                              | 28.6                   |
| CoAl-LDH nanoneedles       | 87.3                                               | 46.2                   |
| CoO@ CoAl-LDH nanobouquets | 152.8                                              | 32.4                   |

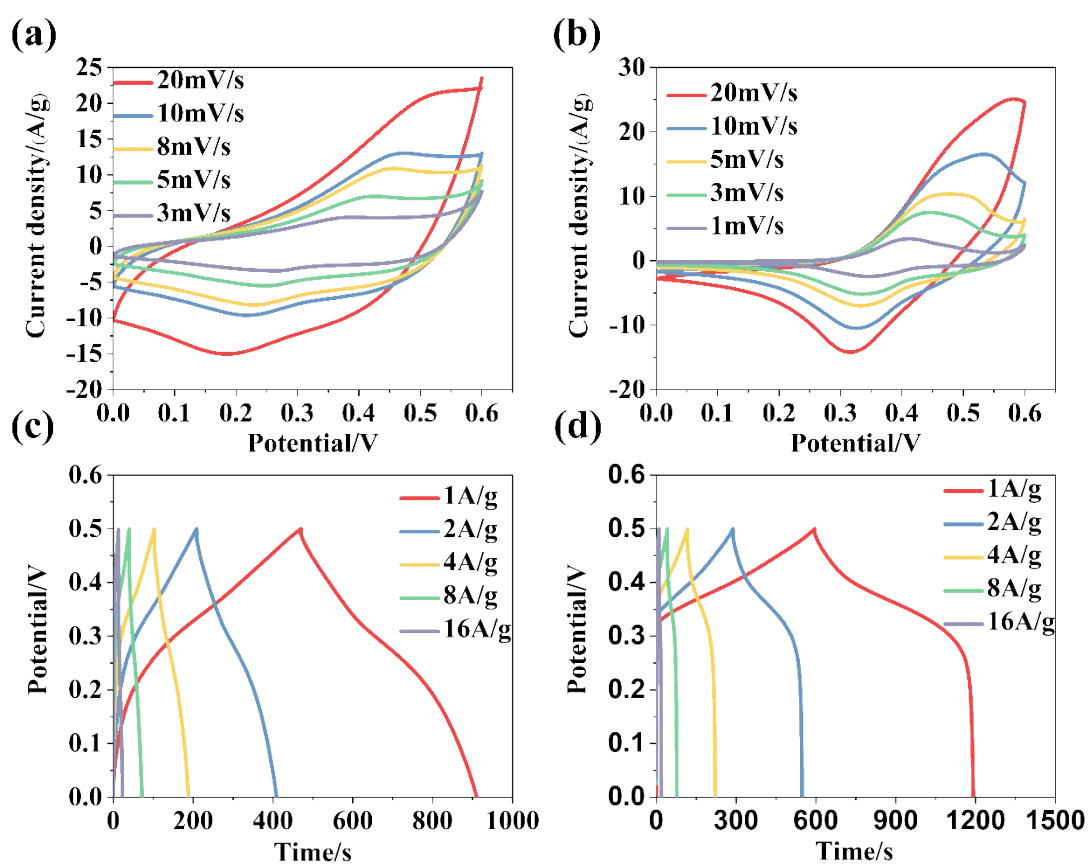**Fig. S3** CV curves of (a) the CoO/NF and (b) the CoAl-LDH/NF at various scan rates; GCD curves of (c) the CoO/NF and (d) the CoAl-LDH/NF at diverse current densities.

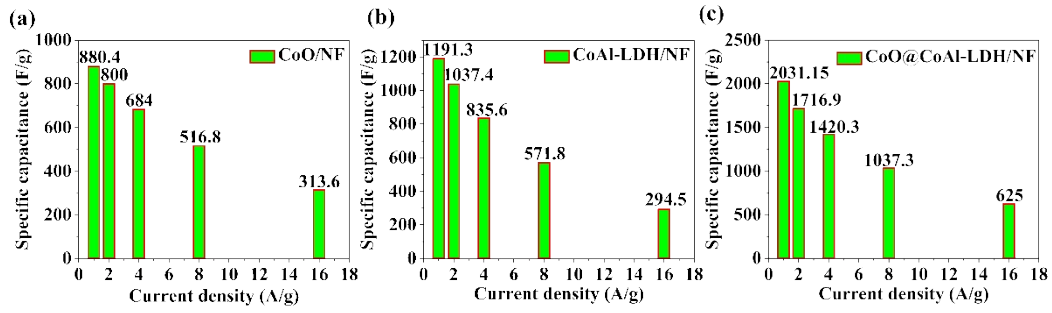

**Fig. S4** Rate capability (histogram) at different scan rates of (a) CoO/NF, (b) CoAl-LDH/NF and (c) CoO@CoAl-LDH/NF

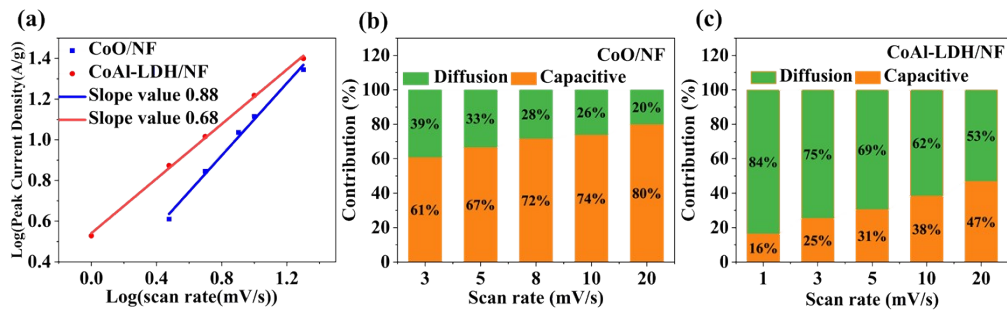

**Fig. S5** (a) The value of the slope at different peak currents after linear fitting and pseudo-capacitance contribution rate (histogram) at different scan rates of (b) CoO/NF and (c) CoAl-LDH/NF

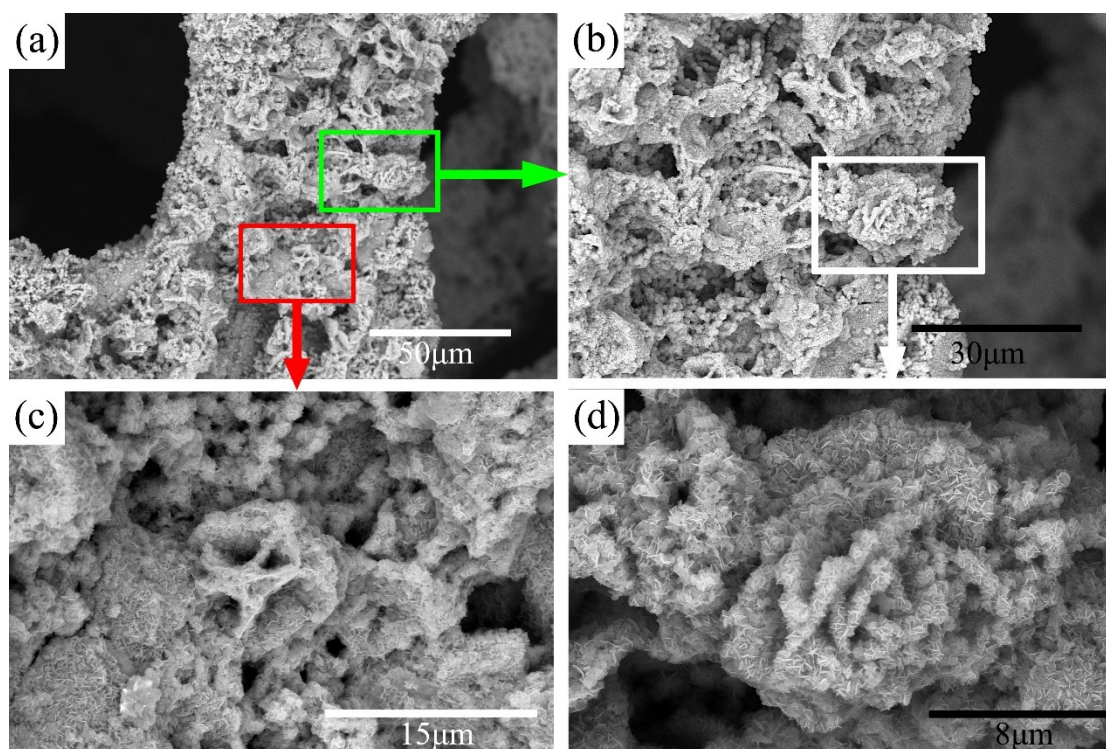

**Fig. S6** SEM images of CoO@CoAl-LDH nanobouquets arrays after 5000 cycles

**Table. S2** Comparison of electrochemical properties of similar substance

| Electrode materials                                | Specific capacitance   | Cycle stability               | Ref |
|----------------------------------------------------|------------------------|-------------------------------|-----|
| CoAl-LDH/rGO                                       | 1492F/g<br>(at 1A/g)   | 94.3%<br>(after 5000 cycles)  | [1] |
| Co <sub>3</sub> O <sub>4</sub> @CoAl-LDH           | 1899.4F/g<br>(at 1A/g) | 96.8%<br>(after 5000 cycles)  | [2] |
| Ni <sub>3</sub> S <sub>2</sub> /CoAl-LDH/rGO       | 2457.5F/g<br>(at 1A/g) | 90.0%<br>(after 5000 cycles)  | [3] |
| NiCo <sub>2</sub> O <sub>4</sub> @NiCoAl-LDH       | 1814.2F/g<br>(at 1A/g) | 93.0%<br>(after 2000 cycles)  | [4] |
| O <sub>v</sub> -NiCo-LDH                           | 2577.8F/g<br>(at 1A/g) | 73.5%<br>(after 5000 cycles)  | [5] |
| CuCo <sub>2</sub> O <sub>4</sub> @MoO <sub>4</sub> | 1153F/g<br>(at 1A/g)   | 76.56%<br>(after 5000 cycles) | [6] |
| α-phase NiCo-LDH                                   | 1120F/g<br>(at 1A/g)   | 93.8%<br>(after 1000 cycles)  | [7] |

|                                         |                                                    |                              |           |
|-----------------------------------------|----------------------------------------------------|------------------------------|-----------|
| MnO <sub>2</sub> @NiCo-LDH              | 1547F/g<br>(at 1A/g)                               | 82.3%<br>(after 2000 cycles) | [8]       |
| (Ni <sub>3</sub> Co)Se <sub>2</sub> /CC | 2.85F/cm <sup>2</sup><br>(at 2mA/cm <sup>2</sup> ) | 80.8%<br>(after 2000 cycles) | [9]       |
| ZIF-8-C@NiAl-LDH                        | 1370F/g<br>(at 1A/g)                               | 77.0%<br>(after 1000 cycles) | [10]      |
| CoO@CoAl-LDH                            | 2031.2F/g<br>(at 1A/g)                             | 88.2%<br>(after 5000 cycles) | This work |

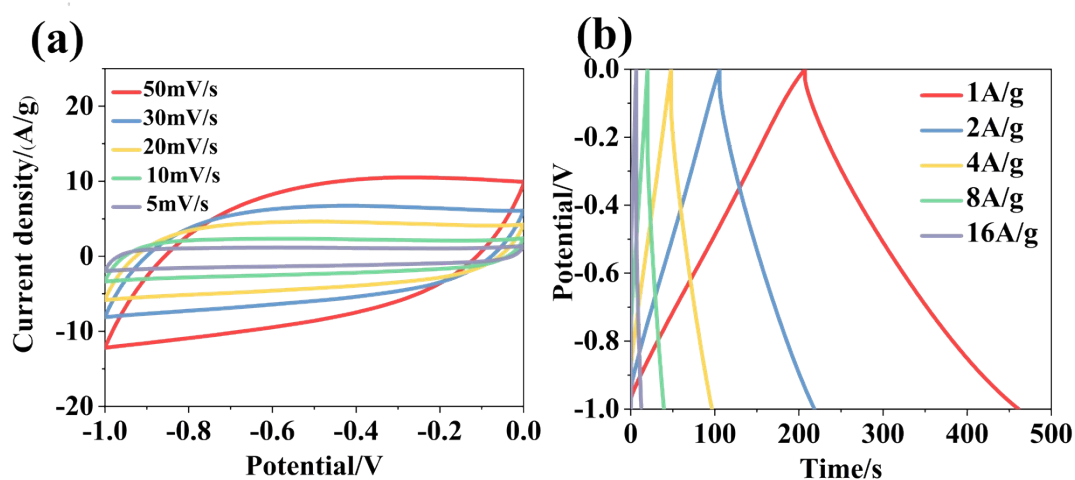

Fig. S7 (a) CV curves of the AC at diverse scan rates; (b) GCD curves of the AC at diverse current densities

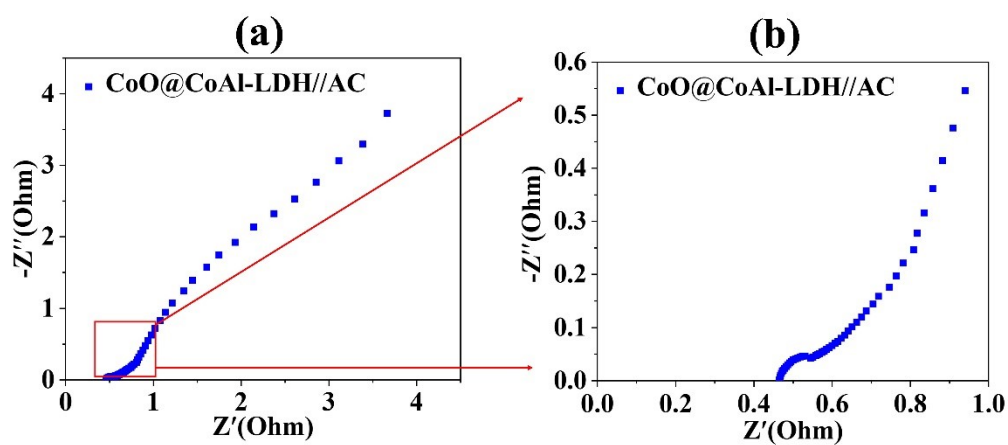

Fig. S8 (a) Nyquist spectra of CoO@CoAl-LDH/NF and (b) enlarged Nyquist spectra of CoO@CoAl-LDH/NF at Z' value range of 0-1.0 ohm.

## Reference

1. Li, J., et al., Structure-controlled Co-Al layered double hydroxides/reduced graphene oxide nanomaterials based on solid-phase exfoliation technique for supercapacitors. *Journal of Colloid and Interface Science*, 2019. **549**: p. 236-245.
2. Long, Y.-W., et al., Hierarchical  $\text{Co}_3\text{O}_4@\text{CoAl}$  hydrotalcite grown on Ni foam for high-performance asymmetric supercapacitors. *Applied Clay Science*, 2021. **210**.
3. Xuan, H., et al., Hierarchical design of core-shell structured  $\text{Ni}_3\text{S}_2/\text{CoAl-LDH}$  composites on rGO/Ni foam with enhanced electrochemical properties for asymmetric supercapacitor. *Journal of Alloys and Compounds*, 2021. **873**.
4. He, X., et al., Hierarchical  $\text{NiCo}_2\text{O}_4@\text{NiCoAl}$ -layered double hydroxide core/shell nanoforest arrays as advanced electrodes for high-performance asymmetric supercapacitors. *Journal of Alloys and Compounds*, 2017. **724**: p. 130-138.
5. Wang, T., et al., Oxygen vacancy-rich flower-like nickel cobalt layered double hydroxides for supercapacitors with ultrahigh capacity. *Ceramics International*, 2022.
6. Hao, C., et al., Fabrication of flower-shaped  $\text{CuCo}_2\text{O}_4@\text{MgMoO}_4$  nanocomposite for high-performance supercapacitors. *Journal of Energy Storage*, 2021. **41**.
7. Li, J., et al., High-stable  $\alpha$ -phase NiCo double hydroxide microspheres via microwave synthesis for supercapacitor electrode materials. *Chemical Engineering Journal*, 2017. **316**: p. 277-287.
8. Wang, X.H., et al., Unique MOF-derived hierarchical  $\text{MnO}_2$  nanotubes@NiCo-LDH/ $\text{CoS}_2$  nanocage materials as high performance supercapacitors. *Journal of Materials Chemistry A*, 2019. **7**(19): p. 12018-12028.
9. Song, W., et al., Rational construction of self-supported triangle-like MOF-derived hollow (Ni,Co) $\text{Se}_2$  arrays for electrocatalysis and supercapacitors. *Nanoscale*, 2019. **11**(13): p. 6401-6409.

10. Han, B., et al., Three dimensional hierarchically porous ZIF-8 derived carbon/LDH core-shell composite for high performance supercapacitors. *Electrochimica Acta*, 2018. **263**: p. 391-399.
